# Supplementary material for: Low-level mitochondrial heteroplasmy modulates DNA replication, glucose metabolism and lifespan in mice
Source: Springer Nature journal article supplement (doi:10.1038/s41598-018-24290-6), 2018-04-11
Supplement: MOESM1 [file 41598_2018_24290_MOESM1_ESM.pdf › 41598_2018_24290_MOESM1_ESM.pdf]

## Supplementary information

### Low-level mitochondrial heteroplasmy modulates DNA replication, glucose metabolism and lifespan in mice

Misa Hirose, Paul Schilf, Yask Gupta, Kim Zarse, Axel Künstner, Anke Fähnrich, Hauke Busch, Junping Yin, Marvin N Wright, Andreas Ziegler, Marie Vallier, Meriem Belheouane, John F Baines, Diethard Tautz, Kornelia Johann, Rebecca Oelkrug, Jens Mittag, Hendrik Lehnert, Alaa Othman, Olaf Jöhren, Markus Schwaninger, Cornelia Prehn, Jerzy Adamski, Kensuke Shima, Jan Rupp, Robert Häslar, Georg Fuellen, Rüdiger Köhling, Michael Ristow, Saleh M Ibrahim

**Figure S1: Analysis for the lifespan in females, excluded earlier death. No difference in aging score and age-related diseases incidence between B6 and B6-mt<sup>AKR</sup>.**

**Figure S2: Mitochondrial functions normalized with protein amount do not correlate to the levels of the 12A heteroplasmy.**

**Figure S3: Mitochondrial functions in aged mice maintain a trend of positive correlation with the levels of the 12A heteroplasmy.**

**Figure S4: Impaired metabolic phenotypes in B6-mt<sup>AKR</sup> mice.**

**Figure S5: Heteroplasmy in *mt-Tr* does not correlate with lifespan in mice.**

**Table S1: The list of mtDNA mutation in B6 and B6-mt<sup>AKR</sup> mice.**

**Table S2: The statistical analysis for the lifespan of B6 and B6-mt<sup>AKR</sup> mice.**

**Table S3: Nuclear genome difference between B6 and B6-mt<sup>AKR</sup> mice.**

**Data S1: List of differentially expressed genes between mice with higher 12A heteroplasmy levels (B6-mt<sup>AKR</sup>) and those with lower 12A heteroplasmy levels (B6).**

**Data S2: List of Biological Process Ontology terms significantly up-regulated or down-regulated in mice with higher 12A heteroplasmy levels (B6-mt<sup>AKR</sup>) compared to those with lower 12A heteroplasmy levels (B6).**

**Data S3: List of Biological Process Ontology terms that were commonly affected by aging and the levels of 12A heteroplasmy.**

Figure S1

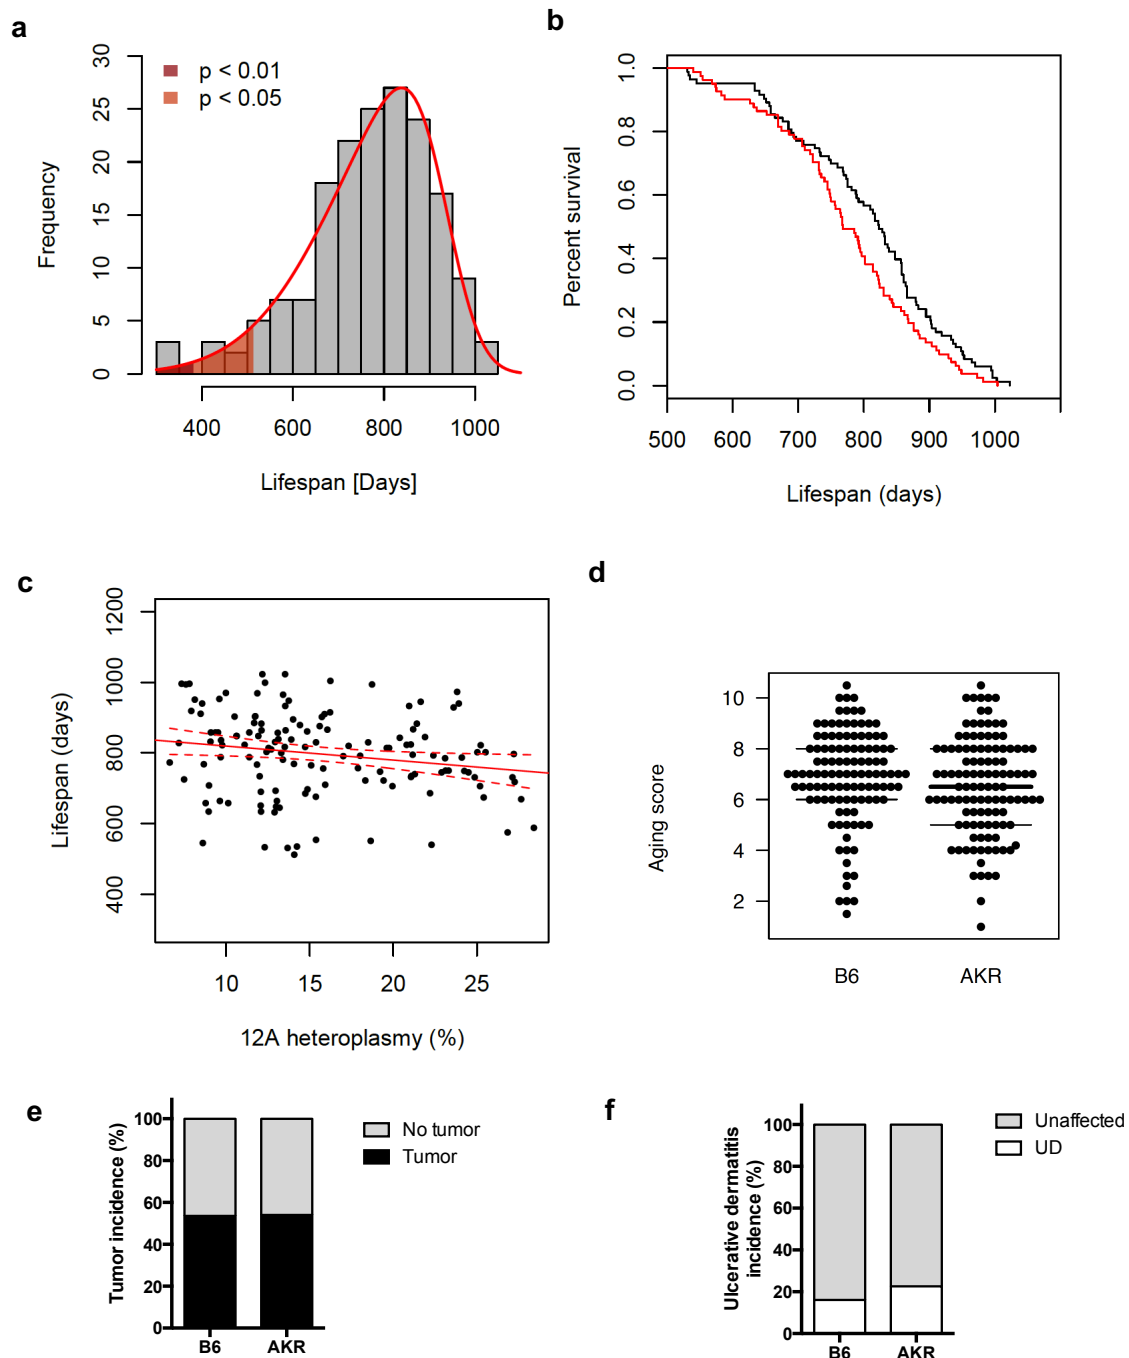

**Figure S1: Analysis for the lifespan in females, excluded earlier death. No difference in aging score and age-related diseases incidence between B6 and B6-mt<sup>AKR</sup>.**

**(a)** Lifespan distribution in females. Lifespan data of all females (both B6 and B6-mt<sup>AKR</sup>) were fitted to a skew normal distribution. The  $P < 0.05$  cut-off lies at 517 days.

**(b)** Using this criterion the deaths before 517 days were eliminated, and survival curves are plotted for female mice.  $P = 0.0284$ , log-rank test.

**(c)** Correlation between 12A heteroplasmy levels and lifespan of female mice, excluding the deaths before 517 days.  $\rho = -0.2272$ ,  $P = 0.0072$ , Spearman test. Dashed lines indicate the 95% confidence interval of a linear fit indicated by the solid line.

**(d)** Aging score was determined in B6 (male,  $n=47$ ; female,  $n=67$ ) and B6-mt<sup>AKR</sup> (male,  $n=54$ ; female,  $n=59$ ). The upper and bottom dot lines indicate the 75% and 25% quintile, respectively, while the middle bar shows the median.

**(e)** Tumor incidence in B6 (male,  $n=49$ ; female,  $n=69$ ) and B6-mt<sup>AKR</sup> (male,  $n=65$ ; female,  $n=74$ ).

**(f)** Incidence of ulcerative dermatitis in B6 (male,  $n=68$ ; female,  $n=87$ ) and B6-mt<sup>AKR</sup> (male,  $n=78$ ; female,  $n=84$ ). AKR=B6-mt<sup>AKR</sup>.

**Figure S2**

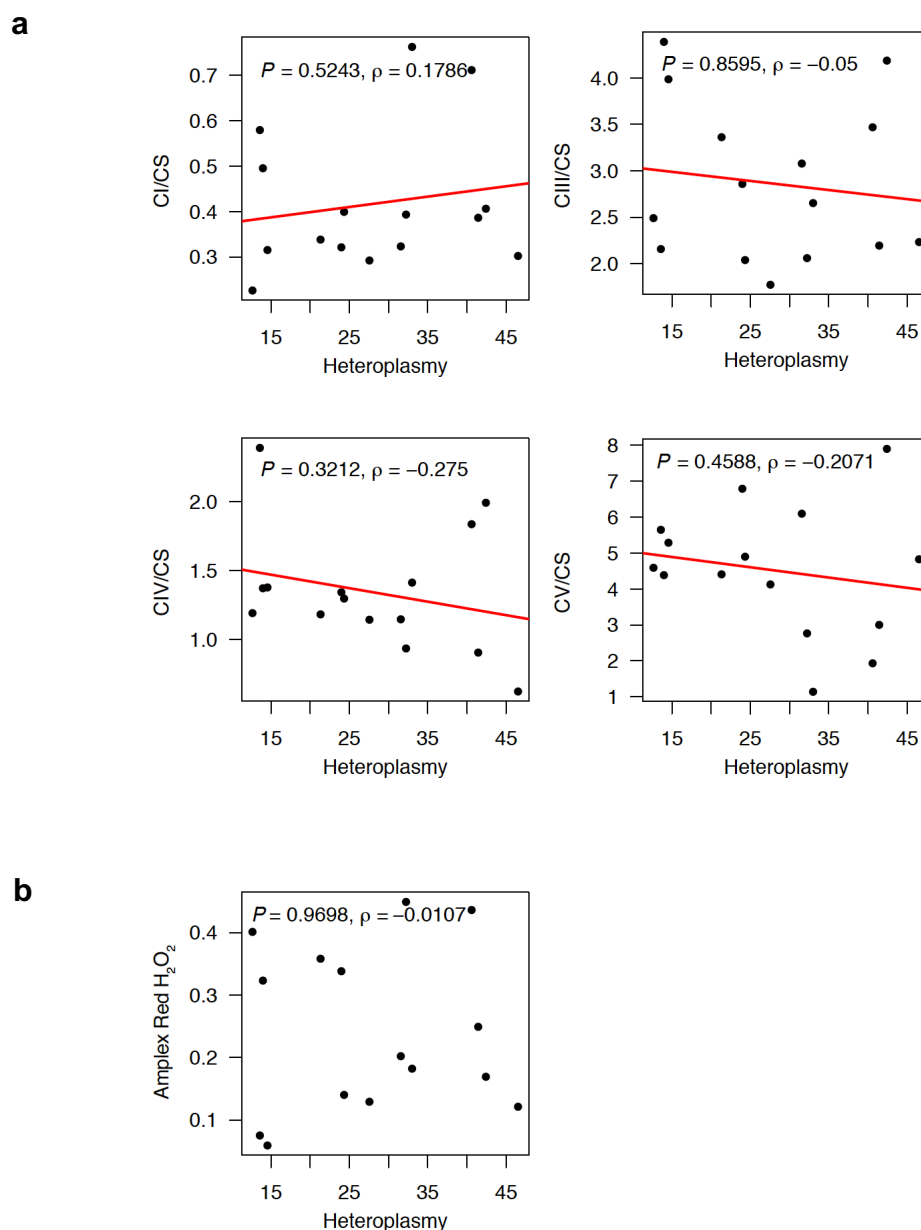

**Figure S2: Mitochondrial functions normalized with protein amount do not correlate to the levels of the 12A heteroplasmy.**

(a) Oxidative phosphorylation (OXPHOS) complex activities measured using liver mitochondria obtained from young mice (3 months old, female, same values measured in **Figure 3a**) normalized to individual citrate synthase activities. The normalized values do not show a positive correlation with the levels of the 12A heteroplasmy (Spearman rank correlation).

**(b)** The levels of hydrogen peroxide in liver mitochondria isolated from young mice (3-5 months old, female, same values measured in **Figure 3b**) normalized to protein amount. The normalized ROS values do not show a positive correlation with the levels of the 12A heteroplasmy in OriL (Spearman rank correlation).

**Figure S3**

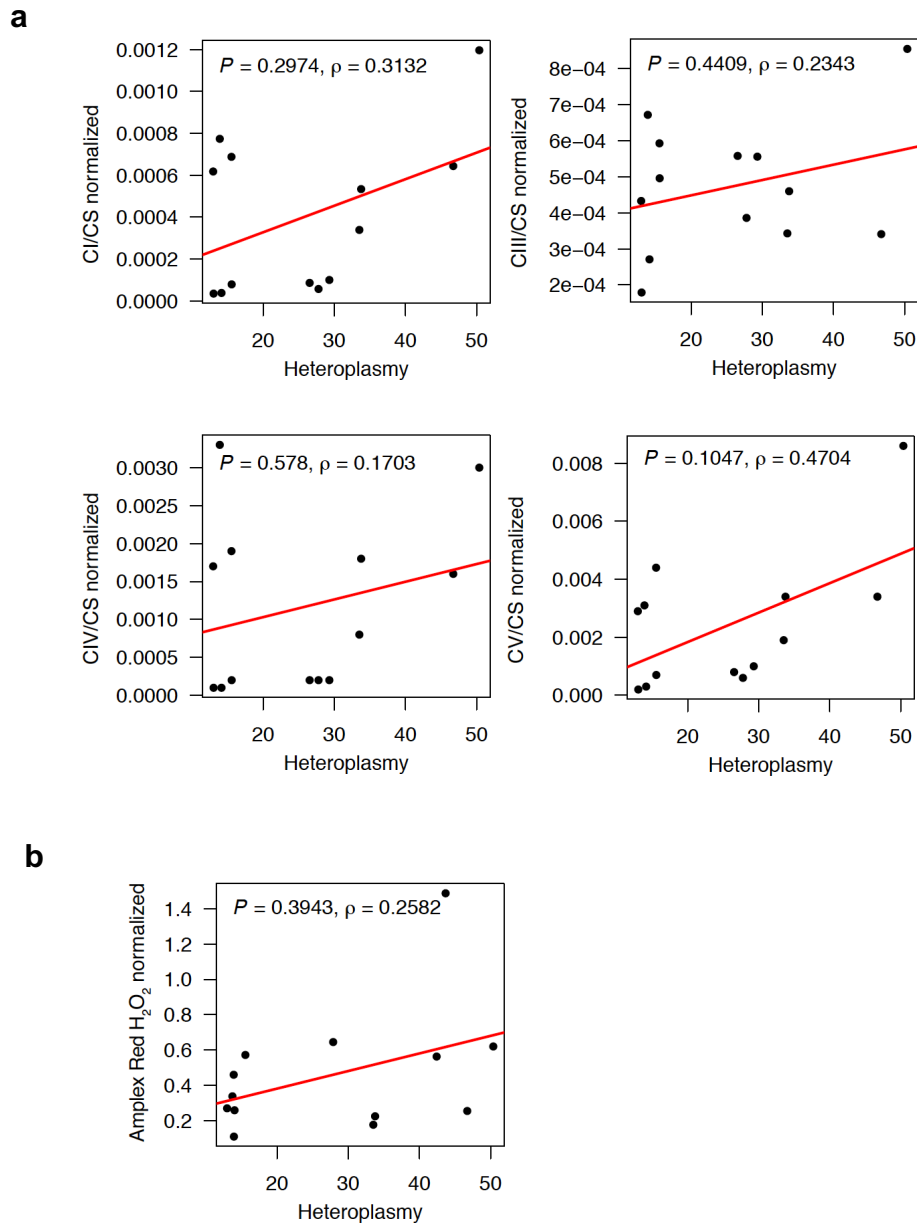

**Figure S3: Mitochondrial functions in aged mice maintain a trend of positive correlation with the levels of the 12A heteroplasmy.**

**(a)** OXPHOS complex activities (normalized with the individual activities of citrate synthase) measured in liver mitochondria from aged mice (19-22 months old, females) normalized to individual mtDNA copy number ratio. The trend of the positive correlation between the 12A heteroplasmy levels and the normalized OXPHOS activities remains in aged mice. N=6 (B6), n=7 (B6-mt<sup>AKR</sup>) (Spearman rank correlation).

**(b)** Levels of hydrogen peroxide in female liver mitochondria from aged mice (18-22 months old) normalized to the individual mtDNA copy number ratio. The trend of the positive correlation

between the ROS levels and the levels of the 12A heteroplasmy remains in aged mice. N=7 (B6), n=8 (B6-mt<sup>AKR</sup>) (Spearman rank correlation).

**Figure S4**

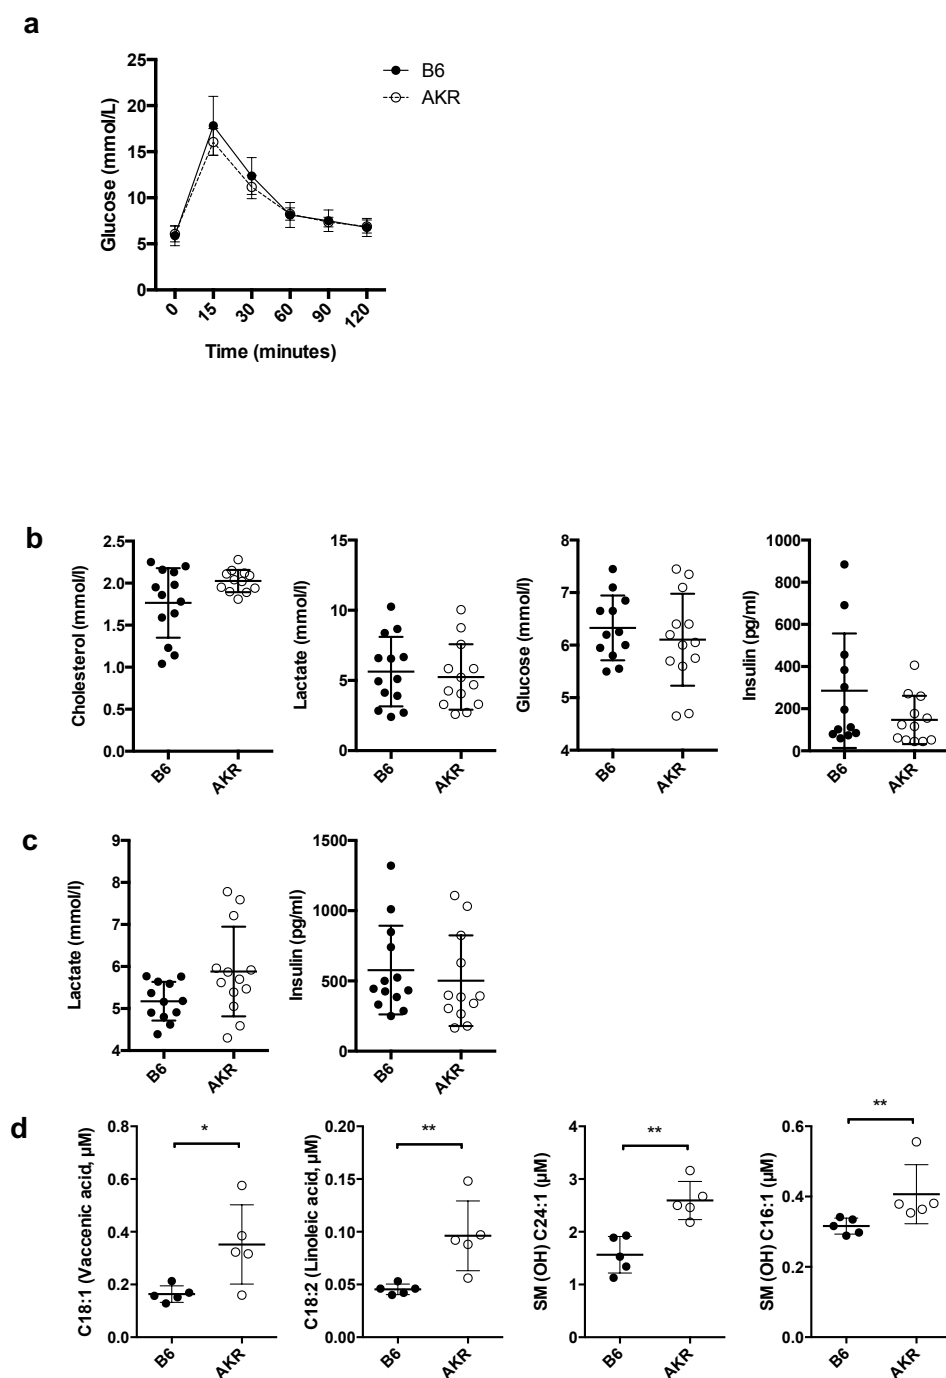

**Figure S4: Impaired metabolic phenotypes in B6-mt<sup>AKR</sup> mice.**

**(a)** Intraperitoneal glucose tolerance test (2g/kg, i.p.) was performed in young (3 months old) B6 and B6-mt<sup>AKR</sup> female mice. N=7/strain.

**(b)** Lipid, glucose, lactate and insulin levels were measured in plasma samples obtained from overnight-fasted B6 and B6-mt<sup>AKR</sup> (3M, females). N=12-13 per strain. AKR=B6-mt<sup>AKR</sup>.



**(c)** Lactate and insulin levels were measured in plasma samples from random-fed B6 and B6-mt<sup>AKR</sup> (3M, females). N=12-13 per strain. AKR=B6-mt<sup>AKR</sup>.

**(d)** Representative lipid metabolites measured in liver samples obtained from B6 and B6-mt<sup>AKR</sup> (female, n=5/strain). \* $P=0.0317$  (C18:1), \*\* $P=0.0079$  (C18:2, SM (OH) C24:1 and SM (OH) C16:1), Mann-Whitney U test.

Figure S5

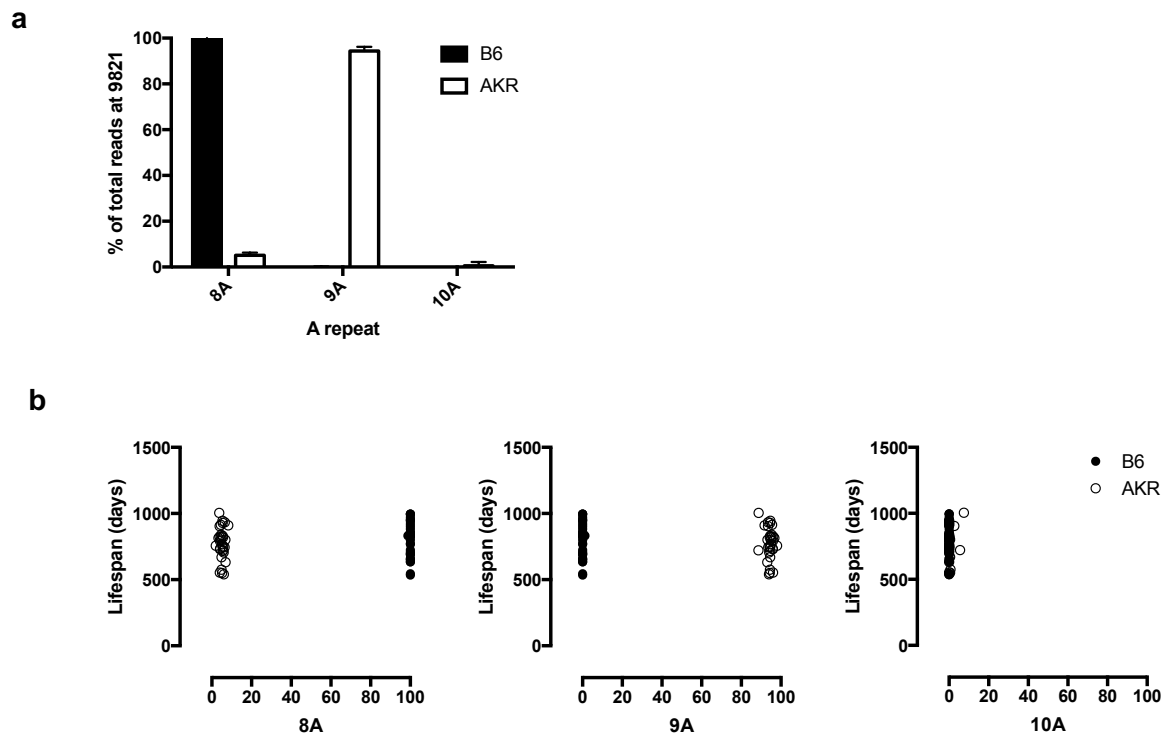

**Figure S5: Heteroplasmy in *mt-Tr* does not correlate with lifespan in mice.**

**(a)** Heteroplasmy at 9821 in mitochondrial tRNA arginine gene (*mt-Tr*) is observed in B6- $\text{mt}^{\text{AKR}}$ . All 32 B6 mice exhibited 8A homoplasmy, while B6- $\text{mt}^{\text{AKR}}$  carry 8A (32 mice), 9A (32 mice) and 10A (7 in 32 mice) with the levels of  $5.10 \pm 1.22\%$ ,  $94.34 \pm 1.90\%$  and  $0.56 \pm 1.66\%$ , respectively (average  $\pm$  SD). AKR=B6- $\text{mt}^{\text{AKR}}$ , n=32 per strain.

**(b)** No correlation between heteroplasmy and lifespan is observed.

**Table S1: List of mtDNA variations in B6-mt<sup>AKR</sup> and B6.**

| Gene                 | <i>OriL</i> *    | <i>mt-Nd3</i> | <i>mt-Tr</i> |
|----------------------|------------------|---------------|--------------|
| Strain\ position     | 5172             | 9461          | 9821         |
| B6-mt <sup>AKR</sup> | 12A, $\geq 20\%$ | C             | 9A           |
| B6                   | 12A, $< 20\%$    | T             | 8A           |
| AA change            | -                | Met-Met       | -            |

\*The levels of the heteroplasmic mutation were identified using NGS in this study.

**Table S2: The statistical analysis for the lifespan of B6 and B6-mt<sup>AKR</sup> mice.**

**a**

|        | Log-rank | Gehan  |
|--------|----------|--------|
| Total  | 0.4450   | 0.1014 |
| Female | 0.0305   | 0.0621 |
| Male   | 0.7075   | 0.5098 |

**b**

|        | N   | Events | Median | 95% confidence interval |
|--------|-----|--------|--------|-------------------------|
| Female | 172 | 169    | 792    | 768-817                 |
| Male   | 147 | 146    | 863    | 842-887                 |

**c**

|                      | N   | Events | Median | 95% confidence interval |
|----------------------|-----|--------|--------|-------------------------|
| B6                   | 155 | 151    | 841    | 823-864                 |
| B6-mt <sup>AKR</sup> | 164 | 164    | 810    | 791-830                 |

**d**

|                      |        | N  | Events | Median | 95% confidence interval |
|----------------------|--------|----|--------|--------|-------------------------|
| B6                   | Female | 87 | 84     | 817    | 781-848                 |
|                      | Male   | 68 | 67     | 871    | 842-904                 |
| B6-mt <sup>AKR</sup> | Female | 85 | 85     | 767    | 745-802                 |
|                      | Male   | 79 | 79     | 847    | 829-890                 |

**(a)** Statistical analysis for survival curves; B6 versus B6-mt<sup>AKR</sup>.

**(b)** Median survival times by sex.

**(c)** Median survival times by strain.

**(d)** Median survival times by sex and strain.

**Table S3: Nuclear genome difference between B6 and B6-mt<sup>AKR</sup> mice.**

| Strain                        |           |                   | B6    |       |       | B6-mt <sup>AKR</sup> |        |        |        |        |        |
|-------------------------------|-----------|-------------------|-------|-------|-------|----------------------|--------|--------|--------|--------|--------|
| Sex                           |           |                   | M     | F     | F     | M                    | F      | M      | F      | F      | M      |
| Mouse ID                      |           |                   | 70015 | 70012 | 70004 | 34596                | 34580  | 39350  | 31977  | 31991  | 31976  |
| ChrB37                        | PosB37    | SNPs              |       |       |       |                      |        |        |        |        |        |
| 1                             | 42424440  | B6_rs31362610     | TT    | TT    | TT    | TT                   | TT     | TT     | TC     | TT     | TC     |
| 1                             | 156715218 | UNC010465120      | TT    | TT    | TT    | TT                   | N.D.*  | TT     | TT     | TG     | TG     |
| 3                             | 84097284  | UNC030314030      | GG    | GG    | GG    | GG                   | GA     | GG     | GG     | GG     | GG     |
| 3                             | 120369799 | B6_03-120369799-S | AA    | AA    | AA    | AA                   | AA     | AA     | AG     | AG     | AG     |
| 3                             | 121531310 | UNC030194728      | CC    | CC    | CC    | CC                   | CC     | CC     | CT     | CT     | CT     |
| 7                             | 78961795  | B6_rs32060039     | CC    | CC    | CC    | CC                   | CG     | CC     | CC     | CC     | CC     |
| 8                             | 26496123  | B6_rs33539160     | AA    | AA    | AA    | AA                   | AG     | AG     | AG     | AG     | AG     |
| 8                             | 77477256  | B6_rs32729089     | TT    | TT    | TT    | TT                   | TA     | TT     | TA     | TA     | TA     |
| 8                             | 120161891 | B6_rs32661424     | CC    | CC    | CC    | CC                   | CC     | CC     | CT     | CC     | CT     |
| 9                             | 6238770   | B6_09-006238770-S | AA    | AA    | AA    | AG                   | AA     | AG     | AA     | AA     | AA     |
| 10                            | 56034586  | B6_rs29377979     | GG    | GG    | GG    | GG                   | GG     | GG     | GA     | GA     | GA     |
| 10                            | 79915030  | B6_rs29349055     | AA    | AA    | AA    | AA                   | AG     | AA     | AG     | AG     | AG     |
| 10                            | 116077282 | UNC100129834      | TT    | TT    | TT    | TT                   | TT     | TT     | TT     | TC     | TT     |
| 10                            | 121868277 | B6_rs29348001     | AA    | AA    | AA    | AA                   | AA     | AA     | AA     | AG     | AA     |
| 11                            | 87932613  | UNC20071212       | CC    | CC    | CC    | CC                   | CC     | CC     | N.D.*  | CC     | CC     |
| 14                            | 22151051  | B6_rs31151615     | TT    | TT    | TT    | TT                   | TT     | TT     | TT     | TC     | TT     |
| 14                            | 22662231  | UNC140101805      | AA    | AA    | AA    | AA                   | AA     | AA     | AA     | AC     | AA     |
| 17                            | 60378784  | B6_rs33169019     | AA    | AA    | AA    | AG                   | AA     | AA     | AG     | AA     | AG     |
| 18                            | 15323094  | UNC180052085      | AA    | AA    | AA    | AA                   | AA     | AA     | AA     | AG     | AA     |
| 18                            | 15408257  | B6_rs13483221     | CC    | CC    | CC    | CC                   | CC     | CC     | CC     | CT     | CC     |
| nDNA homology to C57BL/6J (%) |           |                   | 100   | 100   | 100   | 99.997               | 99.992 | 99.997 | 99.987 | 99.983 | 99.987 |

\*N.D.; no data due to genotyping errors.
